# Supplementary material for: Hypoxia-inducible miR-182 enhances HIF1α signaling via targeting PHD2 and FIH1 in prostate cancer
Source: PubMed Central journal article supplement (PMC4513346; doi:10.1038/srep12495), 2015-07-24
Supplement: srep12495-s1.pdf [file srep12495-s1.pdf]

## **Hypoxia-inducible miR-182 enhances HIF1 $\alpha$ signaling via targeting PHD2 and FIH1 in prostate cancer**

Yan Li<sup>1</sup>, Duo Zhang<sup>1</sup>, Xiaoyun Wang<sup>1</sup>, Xuan Yao<sup>1</sup>, Cheng Ye<sup>1</sup>, Shengjie Zhang<sup>1</sup>, Hui Wang<sup>1</sup>, Cunjie Chang<sup>2</sup>, Hongfeng Xia<sup>1</sup>, Yu-cheng Wang<sup>3,4</sup>, Jing Fang<sup>1,5</sup>, Jun Yan<sup>¶</sup>, Hao Ying<sup>¶,4,5</sup>

<sup>1</sup>Key Laboratory of Food Safety Research, Institute for Nutritional Sciences, Shanghai Institutes for Biological Sciences, University of Chinese Academy of Sciences, Chinese Academy of Sciences, Shanghai 200031, China; <sup>2</sup>Model Animal Research Center, and MOE Key Laboratory of Model Animals for Disease Study, Nanjing University, Nanjing 210061, China; <sup>3</sup>Department of Nutrition, Shanghai Xuhui Central Hospital, Shanghai 200031, China; <sup>4</sup>Clinical Research Center of Institute for Nutritional Sciences, Shanghai Institutes for Biological Sciences, Chinese Academy of Sciences, Shanghai 200031, China; <sup>5</sup>Key Laboratory of Food Safety Risk Assessment, Ministry of Health, Beijing, China.

¶Corresponding author: Hao Ying, Institute for Nutritional Sciences, SIBS, CAS, 320 Yueyang Road, Shanghai 200031, China, Phone: 86-21-54920247, Fax: 86-21-54920291, E-mail: [yinghao@sibs.ac.cn](mailto:yinghao@sibs.ac.cn); Jun Yan, Model Animal Research Center, and MOE Key Laboratory of Model Animals for Disease Study, Nanjing University, Nanjing 210061, China, Phone: 86-25-58641535, Fax: 86-25-58641500, E-mail: [yanjun@nicemice.cn](mailto:yanjun@nicemice.cn)

**Supplementary Table 1. miRNA/siRNAs and oligonucleotide sequences**

| <b>miRNA/siRNA</b>                    | <b>Sense Sequence (5'→3')</b>   | <b>Antisense Sequence (5'→3')</b> |
|---------------------------------------|---------------------------------|-----------------------------------|
| <b>miR-182</b>                        | <b>UUUGGCAAUGGUAGAACUCACACU</b> | <b>AGUGUGAGUUCUACCAUUGCCAAA</b>   |
| <b>N.C.</b>                           | <b>UUCUCCGAACGUGUCACGU</b>      | <b>ACGUGACACGUUCGGAGAA</b>        |
| <b>miR-182 Inhibitor</b>              | <b>AGUGUGAGUUCUACCAUUGCCAAA</b> |                                   |
| <b>Inhibitor NC</b>                   | <b>CAGUACUUUUGUGUAGUACAA</b>    |                                   |
| <b>siHIF1<math>\alpha</math>-854</b>  | <b>AAGUCUGCAACAUGGAAGGUtt</b>   | <b>ACCUUCCAUGUUGCAGACUtt</b>      |
| <b>siHIF1<math>\alpha</math>-1035</b> | <b>GACACAGCCUGGAUAUGAAtt</b>    | <b>UUCAUAUCCAGGCUGUGUCtt</b>      |
| <b>siHIF1<math>\alpha</math>-1941</b> | <b>AGAACCCAUUUUCUACUCAGtt</b>   | <b>CUGAGUAGAAAUGGGUUCUtt</b>      |

**Supplementary Table 2. Primer sequences for RT-PCR**

| <b>gene</b>   | <b>Sense Sequence (5'→3')</b> | <b>Antisense Sequence (5'→3')</b> |
|---------------|-------------------------------|-----------------------------------|
| miR-182       | TTTGGCAATGGTAGAACTCA          |                                   |
| miR-96        | TTTGGCACTAGCACATTTTTGC        |                                   |
| miR-183       | TATGGCACTGGTAGAATCACT         |                                   |
| miR-210       | CTGTGCGTGTGACAGCGGCT          |                                   |
| U6            | ATTCGTGAAGCGTTCCATAT          |                                   |
| Uni-primer    | CGAATTCTAGAGCTCGAGGCAGG       |                                   |
| 18S           | ACCGCAGCTAGGAATAATGGA         | CAAATGCTTTCGCTCTGGTC              |
| PHD2          | GTGCCGTGCATGAACAAGC           | CAGGTGATCTTATCGCCTCGG             |
| FIH1          | GAGTGCCTCTACCCATACCCT         | TCGTAGTCGGGATTGTCAAAGT            |
| VEGF          | AGGGCAGAATCATCACGAAGT         | AGGGTCTCGATTGGATGGCA              |
| HIF1 $\alpha$ | CTGATCATCTGACCAAACTC          | GTTTCAACCCAGACATATCCAC            |
| mCD31         | CTCATTGCGGTGTTGTCAT           | TTCTGTTT-GGCCTTGGCTTT             |
| mVEGF         | CTGCCGTCCGATTGAGACC           | CCCCTCCTTGTACCACTGTC              |
| mPHD2         | AGCTGGTCAGCCAGAAGAGT          | GCCCTCGATCCAGGTGATCT              |
| mFIH1         | CATTGGCATGGAAGGAAATGTG        | GACAGGGTATGGATAGAGGCA             |

**Supplementary Table 3. Primer sequences for ChIP assay**

| <b>Name</b>         | <b>Sense Sequence (5'→3')</b> | <b>Antisense Sequence (5'→3')</b> |
|---------------------|-------------------------------|-----------------------------------|
| <b>miR-182 HRE1</b> | <b>GCTTTTCGAGAGAGCTGGGA</b>   | <b>TCGGCTGGGCCAGGTTCTC</b>        |
| <b>miR-182 HRE2</b> | <b>TCTGTTCTCCAGCTCTAAGG</b>   | <b>ATTCTTCTTTTGGGGACAGC</b>       |
| <b>miR-210 HRE</b>  | <b>GCAGACGTGCAGAAAAGAACG</b>  | <b>CCGTATGCAAATGACCTGGTC</b>      |
| <b>non-HRE</b>      | <b>GCCTTCAGGTGGAGATAGGAGA</b> | <b>TTCAAGGAGACAGGGACAGTGC</b>     |

## Supplementary Fig. S1

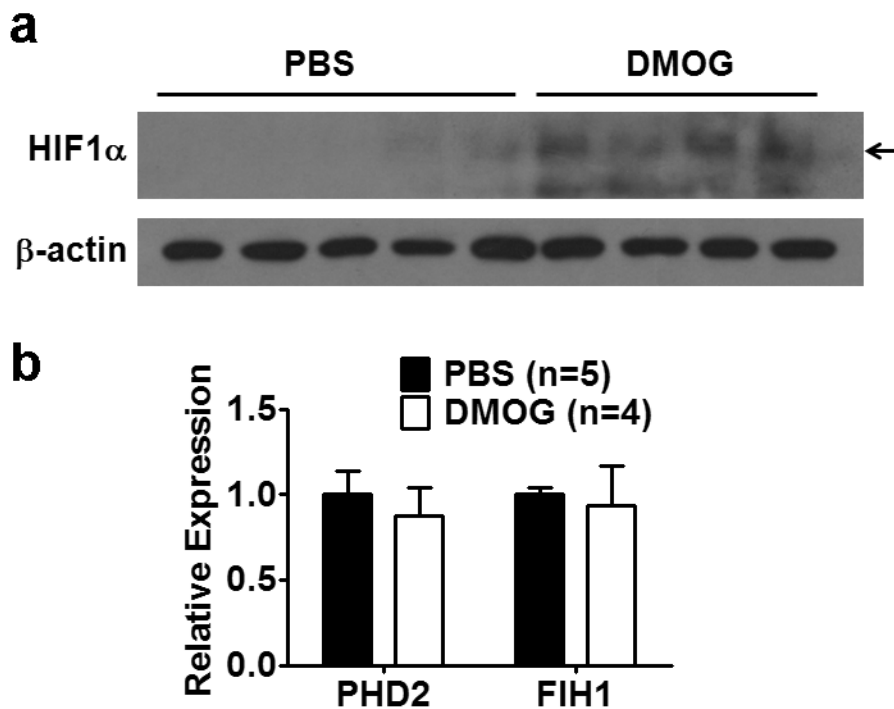

### Supplementary Figure. S1.

C57BL/6 mice were treated with DMOG or vehicle as described in Materials and Methods. The prostate tissues were harvested and the HIF1 $\alpha$  protein expression (a) and PHD2 and FIH1 miRNA expression (b) were determined by western blot analysis and RT-PCR, respectively (n=4-5). Full-length blots are presented in Supplementary Fig. S6.

## Supplementary Fig. S2

|            | HRE1                          |  | HRE2                   |
|------------|-------------------------------|--|------------------------|
| human      | AGCGG <b>GCGT</b> GGCACC----- |  | GTGCT <b>GCGT</b> GTTC |
| chimpanzee | AGCGG <b>GCGT</b> GGCACC----- |  | GTGCT <b>GCGT</b> GTTC |
| monkey     | AGCAG <b>GCCT</b> GGCATC----- |  | GTGCT <b>GCGT</b> GTTC |

### Supplementary Figure. S2.

Sequence alignment of miR-182 promoter region containing hypoxia-responsive elements (HREs) from different species as indicated. The HRE1 and HRE2 are shown in red.

## Supplementary Fig. S3

**a**

PHD2-3'UTR: 5'...GUCCUUGAUC----U--UCU**UUGCCAAA**AU...3'  
MRE-mutant: 5'...GUCCUUGAUC----U--UCU**AACGGUUU**AU...3'

FIH1-3'UTR: 5'...UUUUUUUUUUU-----**UUGCCAAA**AU...3'  
MRE-mutant: 5'...UUUUUUUUUUU-----**UAACGGUUU**AU...3'

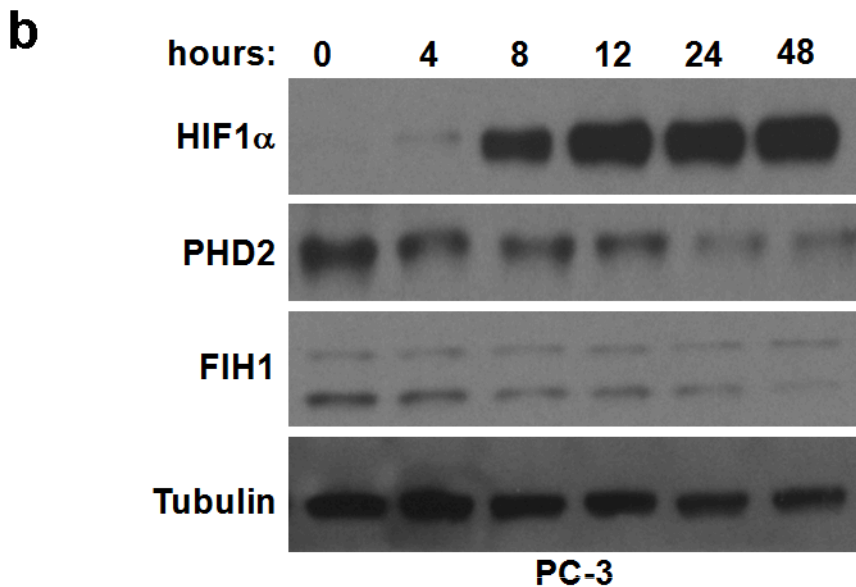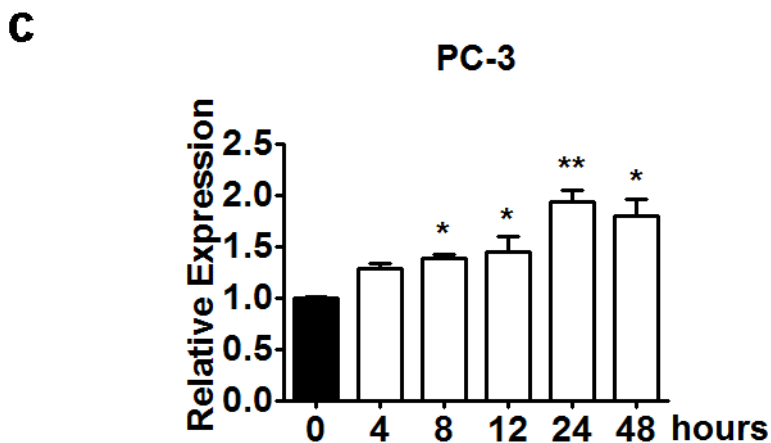

### Supplementary Figure. S3.

(a) Mutation (blue character) were introduced into miR-182 regulatory elements in PHD2 and FIH1 3'-UTR. (b, c) Cellular hypoxia was induced in PC-3 cells for different times as indicated. HIF1 $\alpha$ , PHD2, and FIH1 protein levels were determined by western blot analysis (b). miR-182 expression was analyzed by RT-PCR (c). Data are mean  $\pm$  SEM (n=3). \*p<0.05, \*\*p<0.01. Full-length blots are presented in Supplementary Fig. S6.

## Supplementary Fig. S4

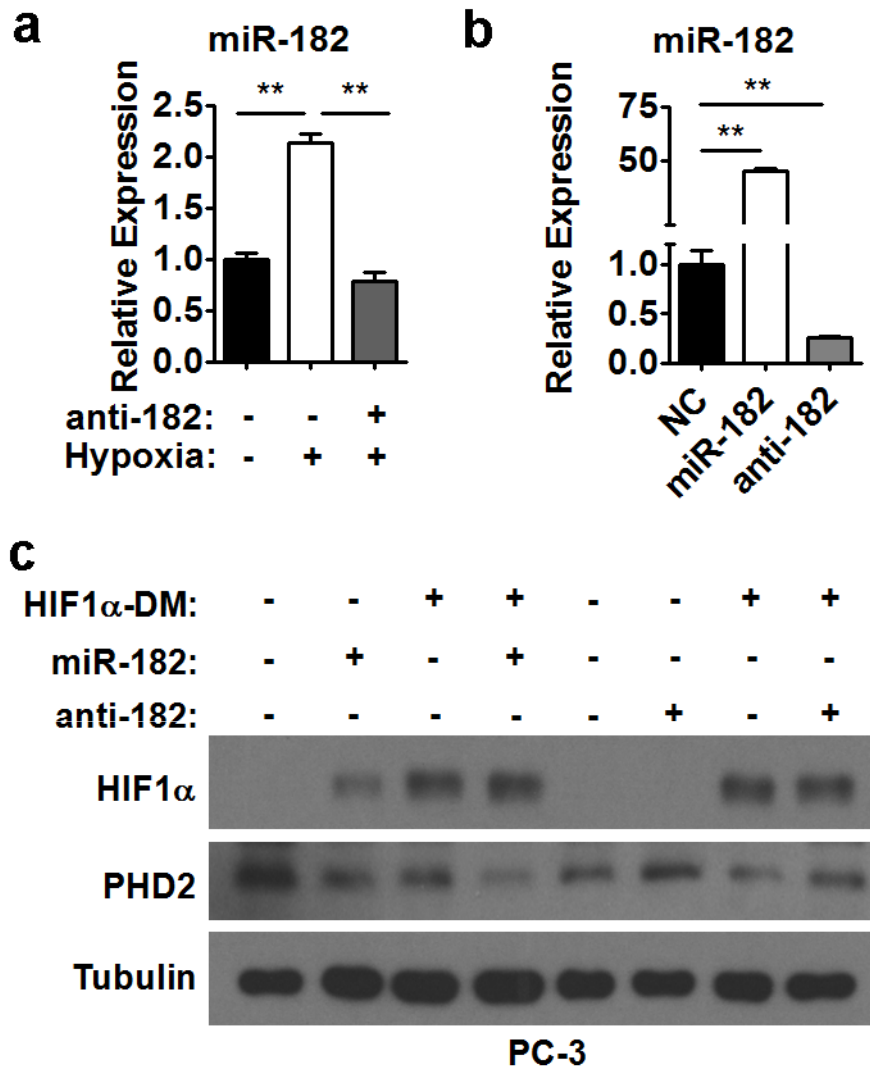

### Supplementary Figure. S4.

(a) RT-PCR analysis of miR-182 expression in PC-3 cells transfected with miR-182 antagomir (anti-182) after the induction of cellular hypoxia. (b) RT-PCR analysis of miR-182 expression in PC-3 cells transfected with miR-182 mimics or miR-182 antagomir (anti-182) in a normoxic environment. Data are mean  $\pm$  SEM (n=3). \*\*p<0.01. (c) PC-3 cells were co-transfected with HIF1 $\alpha$ -DM plasmid and miR-182 mimics or miR-182 antagomir (anti-182). 48 hours after transfection, the protein expression of HIF1 $\alpha$  and PHD2 were determined by western blot analysis. Full-length blots are presented in Supplementary Fig. S6.

## Supplementary Fig. S5

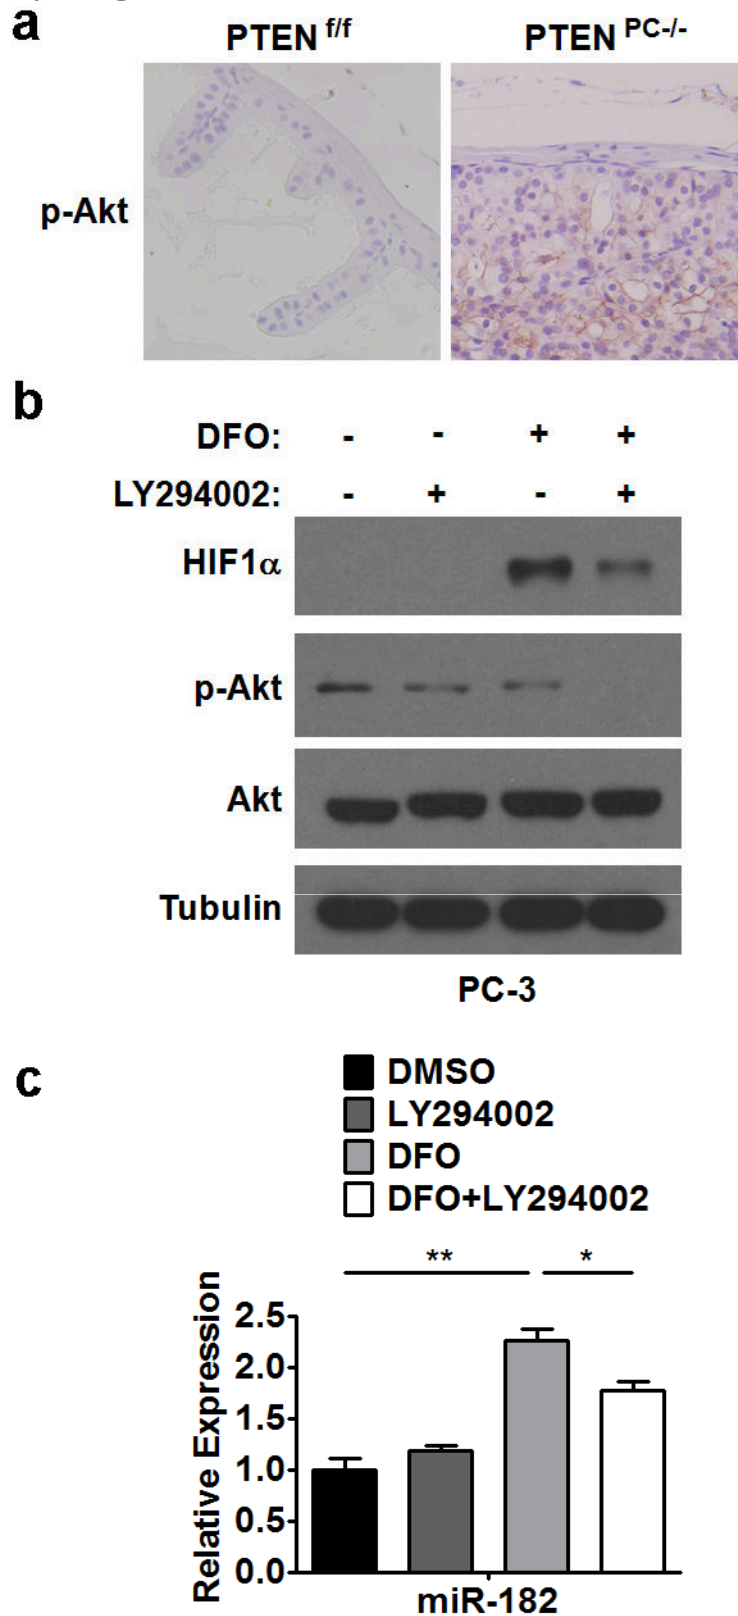

### Supplementary Figure. S5.

(a) Immunostaining of p-Akt in the prostate tissues from PTEN<sup>f/f</sup> and PTEN<sup>PC-/-</sup> mice. (b, c) Western blot analysis of HIF1 $\alpha$ , p-Akt, and total Akt protein expression (b) and RT-PCR analysis of miR-182 expression (c) in PC-3 cells treated with hypoxia inducer DFO and/or PI3K inhibitor LY294002 as indicated for 12 hours. Data are mean  $\pm$  SEM (n=3). \*p<0.05, \*\*p<0.01. Full-length blots are presented in Supplementary Fig. S6.



# Supplementary Fig. S6

## Fig.1c

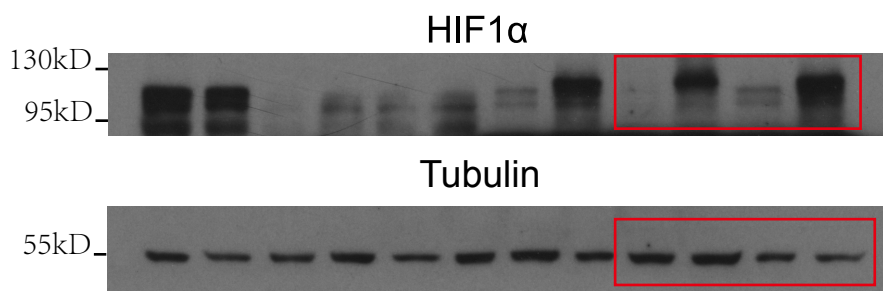

## Fig.1g

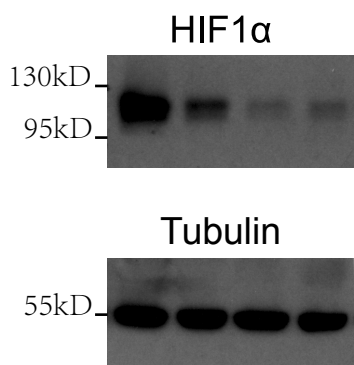

## Fig.S1a

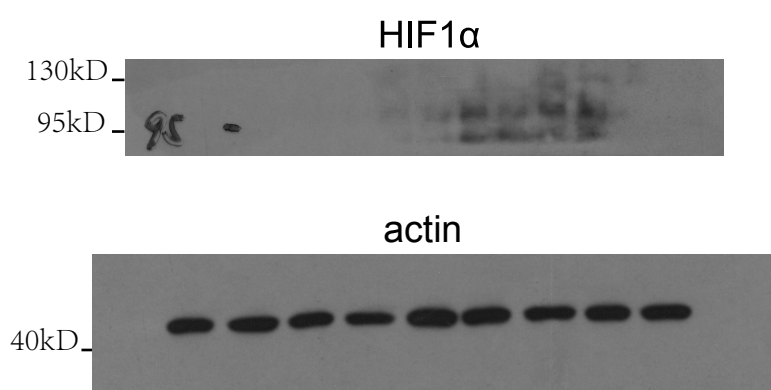

## Fig.3c

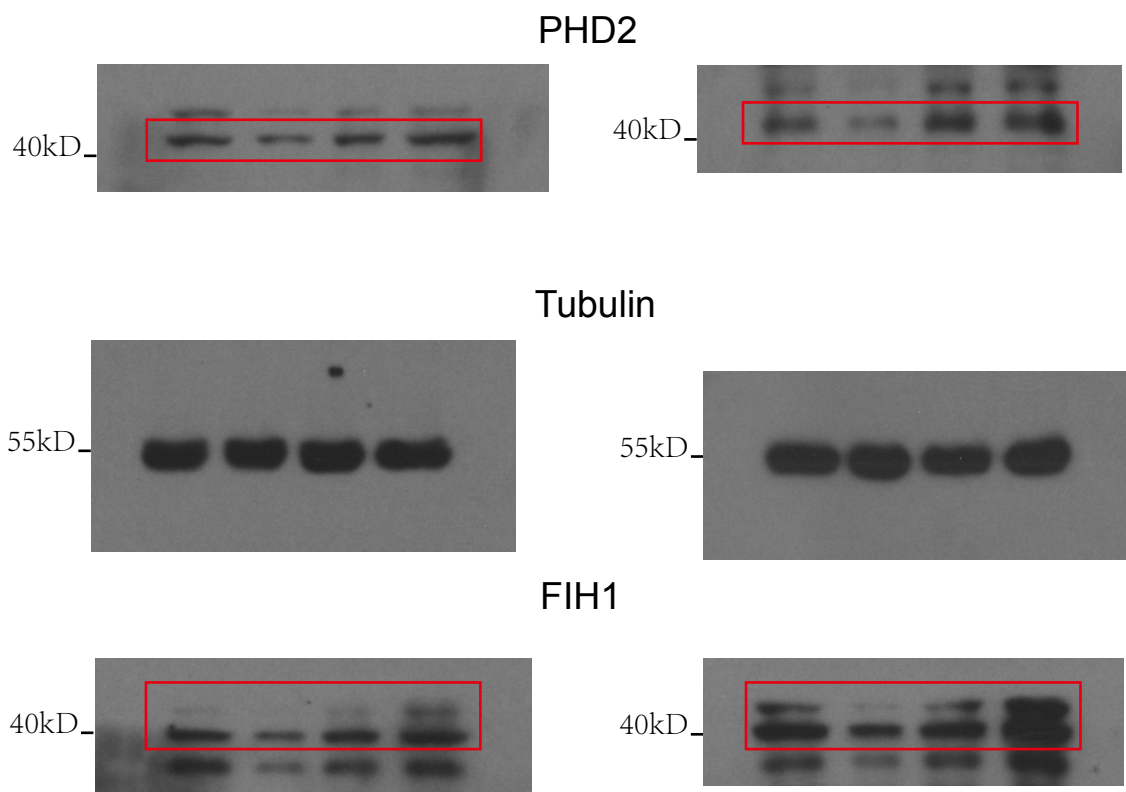

# Supplementary Fig. S6

Full-length blots are shown.

# Supplementary Fig. S6

## Fig.3i & S3b

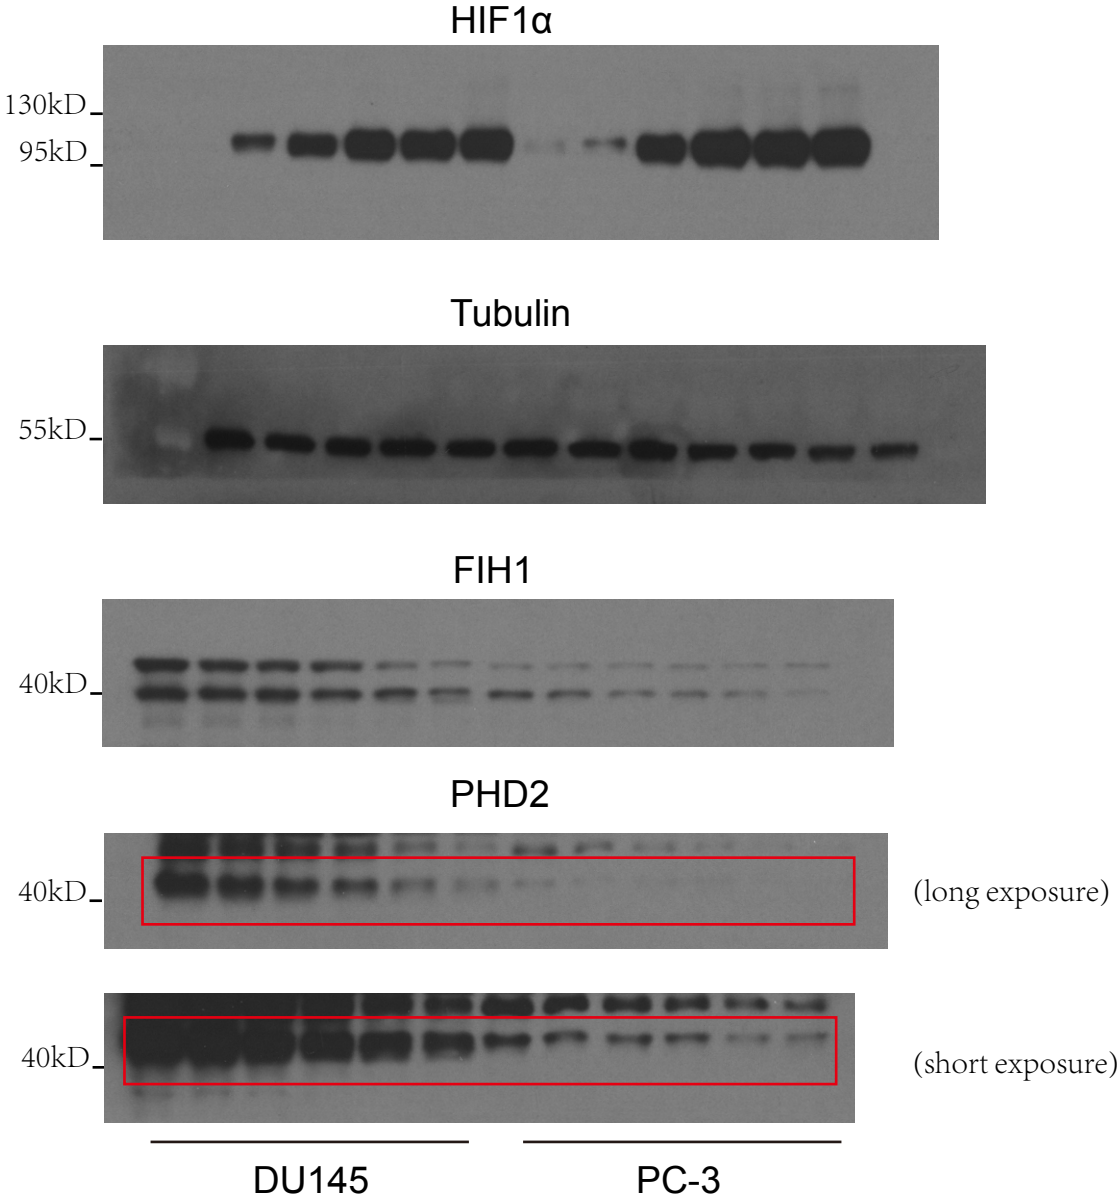

# Supplementary Fig. S6

Full-length blots are shown.

# Supplementary Fig. S6

## Fig.4a

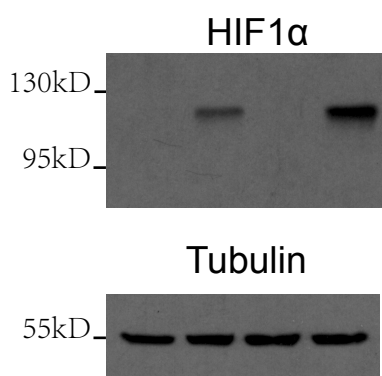

## Fig.4b

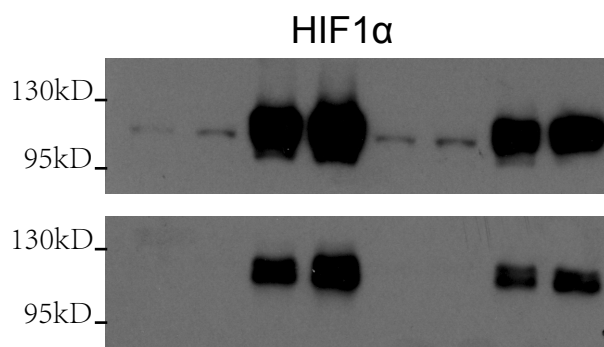

## FIH1

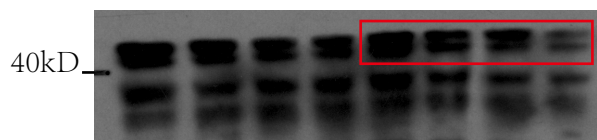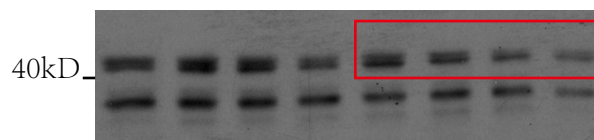

## PHD2

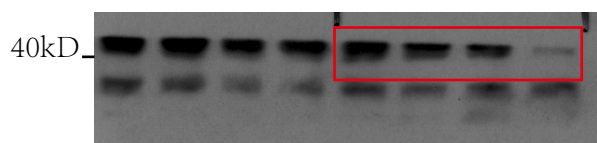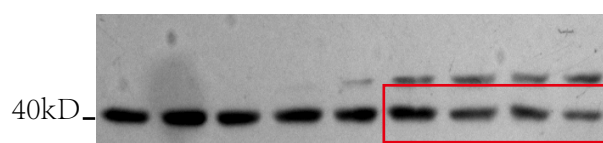

## Tubulin

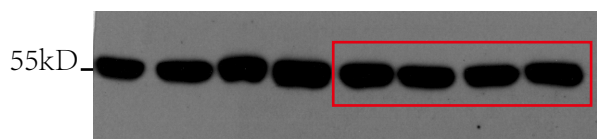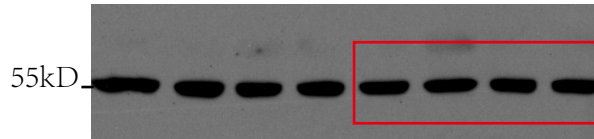

# Supplementary Fig. S6

Full-length blots are shown.

# Supplementary Fig. S6

## Fig.4f

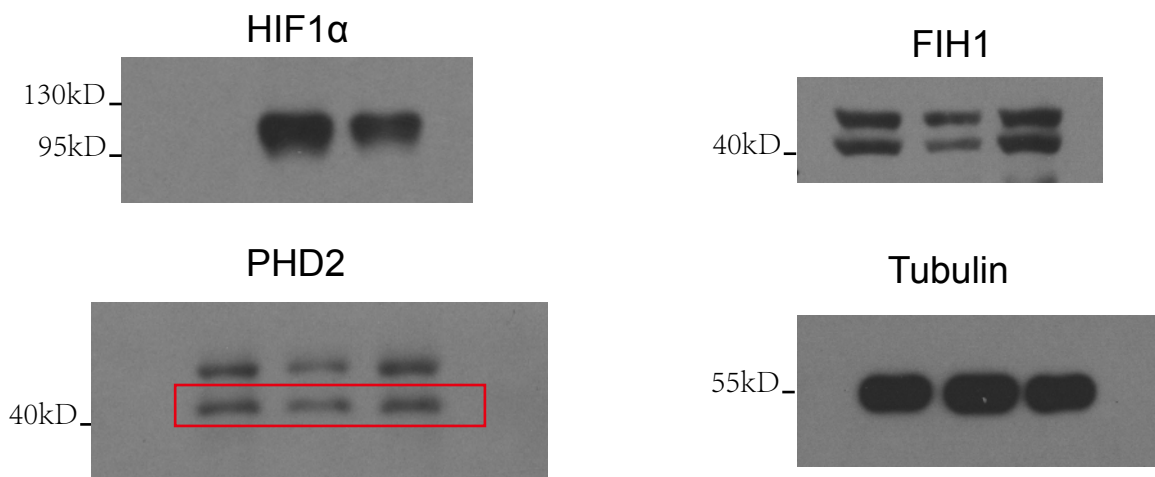

## Fig.4g

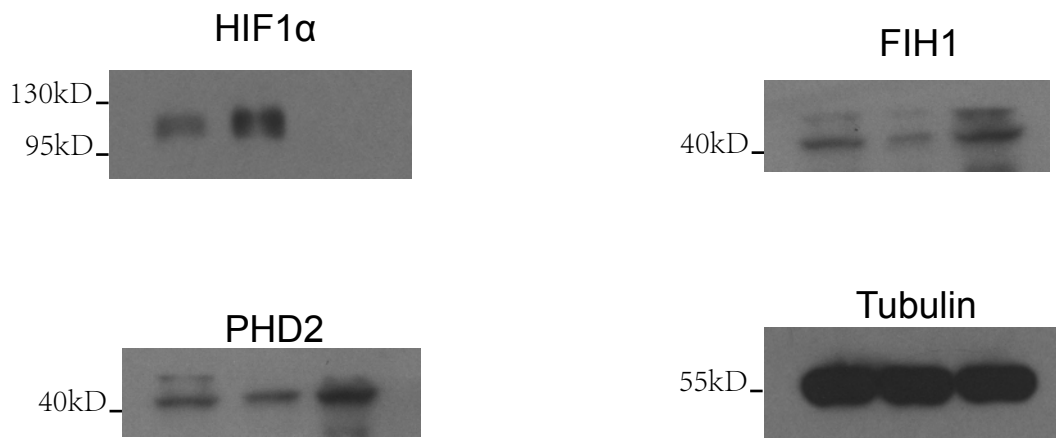

## Fig.S4

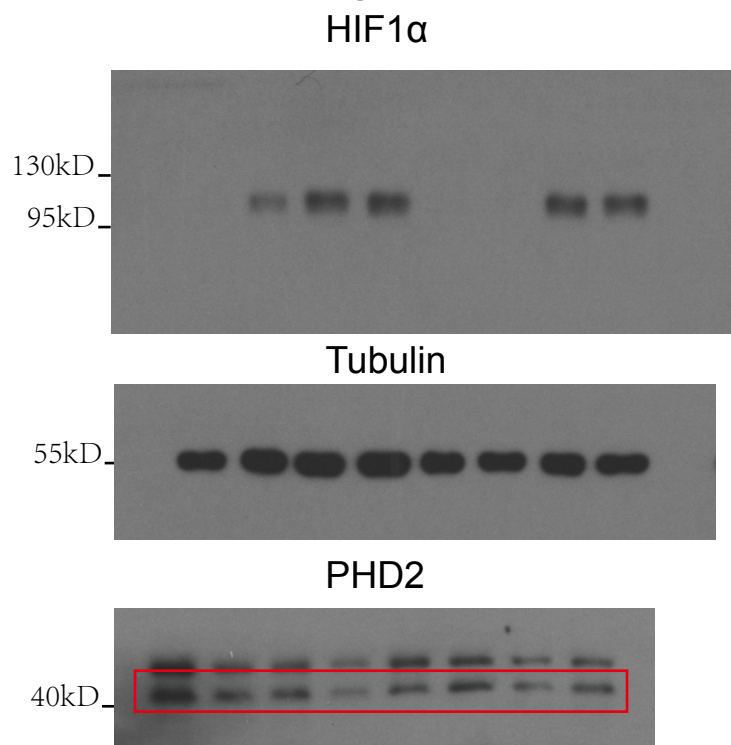

# Supplementary Fig. S6

Full-length blots are shown.

# Supplementary Fig. S6

## Fig.6d

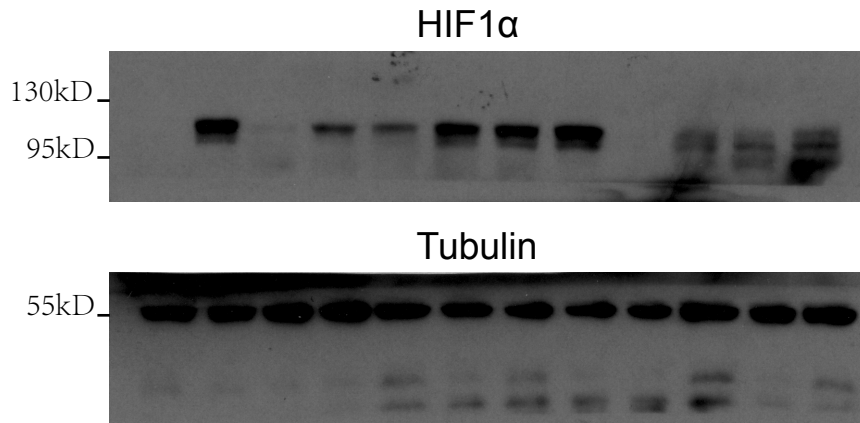

## Fig.S5b

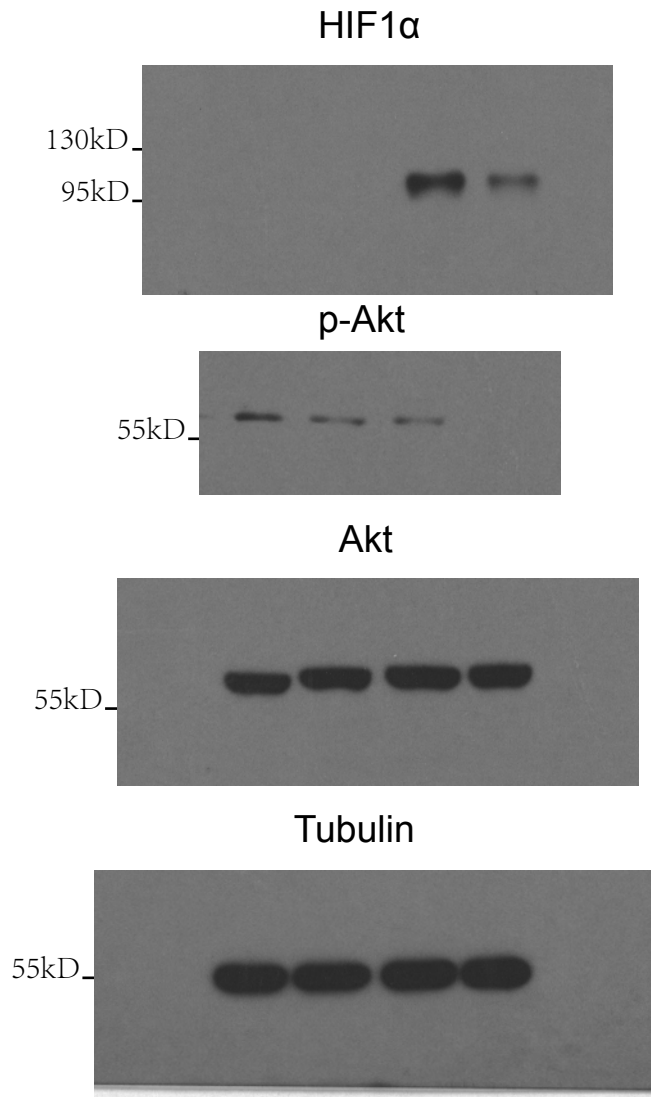

# Supplementary Fig. S6

Full-length blots are shown.
